# Supplementary material for: A small deletion in SERPINC1 causes type I antithrombin deficiency by promoting endoplasmic reticulum stress
Source: PubMed Central journal article supplement (PMC5363556; doi:10.18632/oncotarget.12349), 2016-09-30
Supplement: oncotarget-07-76882-s001.pdf [file oncotarget-07-76882-s001.pdf]

## A small deletion in *SERPINC1* causes type I antithrombin deficiency by promoting endoplasmic reticulum stress

### SUPPLEMENTARY FIGURE

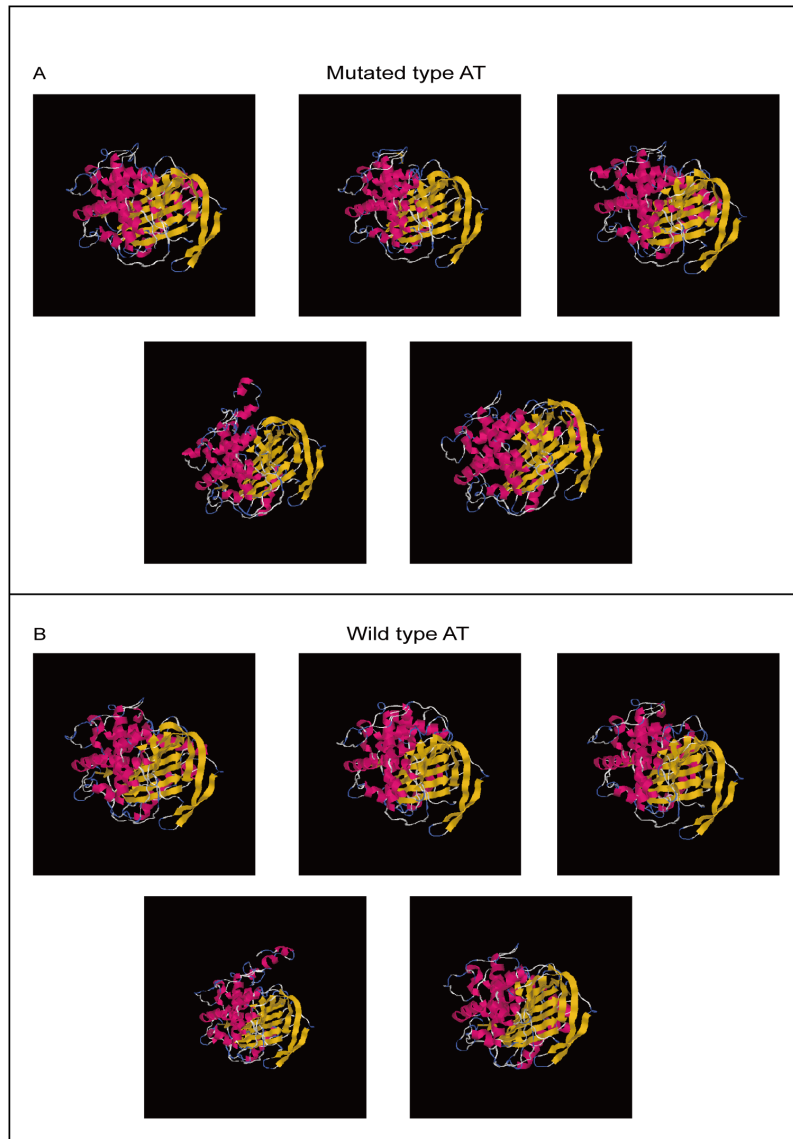

**Supplementary Figure S1: Conformation of mutated and wild-type AT in a computer simulation. A.** Conformation of mutated AT. **B.** Conformation of wild-type AT.
